1 **Ultrapotent SARS-CoV-2 neutralizing antibodies with protective efficacy against**  
2 **newly emerged mutational variants**

3 Tingting Li<sup>1,2,\*</sup>, Xiaojian Han<sup>1,2,\*</sup>, Chenjian Gu<sup>3,\*</sup>, Hangtian Guo<sup>4,5,\*</sup>, Huajun Zhang<sup>6,\*</sup>,  
4 Yingming Wang<sup>1,2,\*</sup>, Chao Hu<sup>1,2</sup>, Kai Wang<sup>7</sup>, Fengjiang Liu<sup>4</sup>, Feiyang Luo<sup>1,2</sup>, Yanan  
5 Zhang<sup>8,9</sup>, Jie Hu<sup>7</sup>, Wang Wang<sup>1,2</sup>, Shenglong Li<sup>1,2</sup>, Yanan Hao<sup>1,2</sup>, Meiyang Shen<sup>10</sup>,  
6 Jingjing Huang<sup>1,2</sup>, Yingyi Long<sup>1,2</sup>, Shuyi Song<sup>1,2</sup>, Ruixin Wu<sup>1,2</sup>, Song Mu<sup>1,2</sup>, Qian  
7 Chen<sup>1,2</sup>, Fengxia Gao<sup>1,2</sup>, Jianwei Wang<sup>1,2</sup>, Shunhua Long<sup>1,2</sup>, Luo Li<sup>1,2</sup>, Yang Wu<sup>3</sup>, Yan  
8 Gao<sup>4</sup>, Wei Xu<sup>3</sup>, Xia Cai<sup>3</sup>, Di Qu<sup>3</sup>, Zherui Zhang<sup>8,9</sup>, Hongqing Zhang<sup>8,9</sup>, Na Li<sup>8,9</sup>,  
9 Qingzhu Gao<sup>7</sup>, Guiji Zhang<sup>7</sup>, Changlong He<sup>7</sup>, Wei Wang<sup>11</sup>, Xiaoyun Ji<sup>5,11</sup>, Ni Tang<sup>7</sup>,  
10 Zhenghong Yuan<sup>3</sup>, Youhua Xie<sup>3,†</sup>, Haitao Yang<sup>4,†</sup>, Bo Zhang<sup>8,†</sup>, Ailong Huang<sup>7,†</sup> and  
11 Aishun Jin<sup>1,2,†</sup>

12 <sup>1</sup>Department of Immunology, College of Basic Medicine, Chongqing Medical  
13 University, Chongqing, 400010, China

14 <sup>2</sup>Chongqing Key Laboratory of Basic and Translational Research of Tumor  
15 Immunology, Chongqing Medical University, Chongqing, 400010, China

16 <sup>3</sup>Key Laboratory of Medical Molecular Virology, Department of Medical  
17 Microbiology and Parasitology, School of Basic Medical Sciences, Shanghai Medical  
18 College, Fudan University, Shanghai, 200032, China

19 <sup>4</sup>Shanghai Institute for Advanced Immunochemical Studies and School of Life  
20 Science and Technology, ShanghaiTech University, Shanghai, 201210, China

21 <sup>5</sup>State Key Laboratory of Pharmaceutical Biotechnology, School of Life Sciences,  
22 Nanjing University, Nanjing, Jiangsu, 210023, China

23 <sup>6</sup>State Key Laboratory of Virology, Wuhan Institute of Virology, Center for Biosafety

24 Mega-Science, Chinese Academy of Sciences, Wuhan, 430071, China

25 <sup>7</sup>Key Laboratory of Molecular Biology on Infectious Diseases, Ministry of Education,

26 Chongqing Medical University, Chongqing, 400010, China

27 <sup>8</sup>Key Laboratory of Special Pathogens and Biosafety, Wuhan Institute of Virology,

28 Center for Biosafety Mega-Science, Chinese Academy of Sciences, Wuhan, 430071,

29 China

30 <sup>9</sup>University of Chinese Academy of Sciences, Beijing, 100049, China

31 <sup>10</sup>Department of Breast Surgery, Harbin Medical University Cancer Hospital, Harbin,

32 150000, China

33 <sup>11</sup>Institute of life sciences, Chongqing Medical University, Chongqing, 400010, China

34 \*These authors contributed equally.

35

36 †Correspondence: yhxie@fudan.edu.cn (Y.H.X); yanght@shanghaitech.edu.cn

37 (H.T.Y); zhangbo@wh.iov.cn (B.Z); ahuang@cqmu.edu.cn (A.L.H);

38 aishunjin@cqmu.edu.cn (A.S.J)

39

40

41 **Abstract**

42 Accumulating mutations in the SARS-CoV-2 Spike (S) protein can increase the  
43 possibility of immune escape, challenging the present COVID-19 prophylaxis and  
44 clinical interventions. Here, 3 receptor binding domain (RBD) specific monoclonal  
45 antibodies (mAbs), 58G6, 510A5 and 13G9, with high neutralizing potency blocking  
46 authentic SARS-CoV-2 virus displayed remarkable efficacy against authentic B.1.351  
47 virus. Each of these 3 mAbs in combination with one neutralizing Ab recognizing  
48 non-competing epitope exhibited synergistic effect against authentic SARS-CoV-2  
49 virus. Surprisingly, structural analysis revealed that 58G6 and 13G9, encoded by the  
50 *IGHV1-58* and the *IGKV3-20* germline genes, both recognized the steric region  
51 S<sup>470-495</sup> on the RBD, overlapping the E484K mutation presented in B.1.351. Also,  
52 58G6 directly bound to another region S<sup>450-458</sup> in the RBD. Significantly, 58G6 and  
53 510A5 both demonstrated prophylactic efficacy against authentic SARS-CoV-2 and  
54 B.1.351 viruses in the transgenic mice expressing human ACE2 (hACE2), protecting  
55 weight loss and reducing virus loads. These 2 ultrapotent neutralizing Abs can be  
56 promising candidates to fulfill the urgent needs for the prolonged COVID-19  
57 pandemic.

58

## 59 **Introduction**

60 The persistence of COVID-19 in the global population can result in the accumulation  
61 of specific mutations of SARS-CoV-2 with increased infectivity and/or reduced  
62 susceptibility to neutralization<sup>1-12</sup>. Highly transmissible SARS-CoV-2 variants, such  
63 as B.1.351 emerged in South Africa, harbor multiple immune escape mutations, and  
64 have raised global concerns for the efficacy of available interventions and for  
65 re-infection<sup>2-9,11</sup>. As these challenges presented, the protective efficacy of current  
66 antibody-based countermeasures needs to be thoroughly assessed against the current  
67 mutational variants.

68 The major interest of neutralizing therapies has been targeted towards SARS-CoV-2  
69 RBD, which is the core region for the host cell receptor ACE2 engagement<sup>13-23</sup>.  
70 B.1.351 bears 3 mutations, S<sup>K417N</sup>, S<sup>E484K</sup> and S<sup>N501Y</sup>, in its RBD, the first 2 of which  
71 have been proven to be the cause for its evasion from neutralizing Ab and serum  
72 responses<sup>2-9</sup>. Nevertheless, a small group of SARS-CoV-2 RBD specific neutralizing  
73 Abs demonstrated undisturbed *in vitro* potency against B.1.351<sup>2,4-7,9</sup>. Evaluating their  
74 therapeutic efficacy against the circulating strains is necessary for the reformulation of  
75 protective interventions and vaccines against the evolving pandemic.

76 Here, we focused on 20 neutralizing Abs selected from a SARS-CoV-2 RBD  
77 specific mAb reservoir and confirmed their potency against authentic SARS-CoV-2  
78 virus. Excitingly, at least 3 of our mAbs showed remarkable neutralizing efficacy  
79 against authentic B.1.351 virus. 58G6, one of our top neutralizing Abs, was found to

80 target a region of S<sup>450-458</sup> and a steric site S<sup>470-495</sup> on the receptor binding motif (RBM).  
81 Furthermore, ultrapotent 58G6 and 510A5 exhibited strong prophylactic efficacy in  
82 SARS-CoV-2- and B.1.351-infected hACE2-transgenic mice. Our study has  
83 characterized a pair of neutralizing Abs with potential effective therapeutic value in  
84 clinical applications, which may provide updated information for RBD specific mAbs  
85 against the prolonged COVID-19 pandemic.

86

## 87 **Results**

### 88 **SARS-CoV-2 RBD specific neutralizing Abs exhibited sustained efficacy against** 89 **authentic B.1.351**

90 By our recently established rapid neutralizing Abs screening system<sup>24</sup>, we have  
91 successfully obtained 20 neutralizing Abs with high affinities to SARS-CoV-2 RBD  
92 from COVID-19 convalescent individuals, and their neutralizing potencies were  
93 confirmed by the half inhibition concentrations (IC<sub>50</sub>s) against authentic SARS-CoV-2  
94 virus quantified via qRT-PCR (Fig. 1a, c and Extended Data Fig. 1). Here, we  
95 analyzed the neutralizing potency of our top 10 neutralizing Abs against authentic  
96 SARS-CoV-2 and B.1.351 viruses by the plaque-reduction neutralization testing  
97 (PRNT). At least 3 of our potent neutralizing Abs 58G6, 510A5 and 13G9 exhibited  
98 striking neutralizing efficacy against SARS-CoV-2, with the IC<sub>50</sub>s value ranging from  
99 1.285 to 9.174 ng/mL (Fig. 1b, c). Importantly, the RBD escape mutations of B.1.351

100 did not compromise the neutralizing efficacy of 58G6 and 510A5, with the IC<sub>50</sub>s of  
101 1.660 and 2.235 ng/ml respectively (Fig. 1b, c). As reported for a wide range of RBD  
102 specific neutralizing Abs<sup>2-9</sup>, authentic B.1.351 virus has challenged some of the tested  
103 mAbs (Fig. 1b, c). However, majority of our top 10 mAbs still exhibited neutralizing  
104 capabilities against this variant (Fig. 1b, c). Of note, the neutralizing potencies of all  
105 10 mAbs against the B.1.1.7 pseudovirus were shown to be similar to those against  
106 the SARS-CoV-2 pseudovirus (Fig. 1c and Extended Data Fig. 2). In addition, the  
107 binding affinity of 58G6 to the B.1.351 S1 subunit was comparable to that to the  
108 SARS-CoV-2 S1, while 510A5 and 13G9 showed higher binding affinity to the S1  
109 subunit of SARS-CoV-2 than that of B.1.351 (Extended Data Fig. 3). Majority of  
110 these top 20 neutralizing Abs exhibited no cross-reactivity to the SARS-CoV S  
111 protein or the MARS-CoV S protein (Extended Data Fig. 4). Collectively, 3 RBD  
112 specific mAbs demonstrated potent neutralizing efficacy against authentic  
113 SARS-CoV-2 and B.1.351 viruses, suggesting that our neutralizing Abs might be  
114 applied for the current COVID-19 pandemic.

115

## 116 **The epitopes for potent neutralizing Abs overlapped a key site on SARS-CoV-2** 117 **RBD**

118 To define potential antigenic sites on SARS-CoV-2 RBD, we performed competitive  
119 ELISA with the above top 20 neutralizing Abs and the other 54 mAbs selected from  
120 our developed RBD-specific mAb reservoir. As shown in Fig. 2a, 5 groups of mAbs

121 were identified according to their recognition sites, each of which consisted of mAbs  
122 competing for the epitope for 13G9 (13G9e), the epitope recognized by a  
123 non-neutralizing SARS-CoV-2 specific mAb 81A11 (81A11e), or the epitope  
124 recognized by a SARS-CoV specific neutralizing Ab CR3022 (CR3022e) (Fig. 2a).  
125 Interestingly, the epitopes recognized by the majority of potent neutralizing Abs  
126 overlapped with 13G9e (Fig. 2a). Next, we confirmed that the top 20 mAbs could  
127 directly inhibit the interaction of SARS-CoV-2 RBD and ACE2 by the competitive  
128 ELISA and surface plasmon resonance (SPR) assay (Extended Data Fig. 5 and 6). To  
129 assess the interrelationships between the epitopes recognized by our top 20  
130 neutralizing Abs in detail, we performed competitive ELISA using biotinylated mAbs.  
131 We found that 16 of them competed with 13G9, whereas the antigenic sites of the  
132 other 4 Abs (510A5, 55A8, 57F7 and 07C1) overlapped with an independent epitope  
133 (510A5e) (Extended Data Fig. 7). These findings suggest that there are at least 2  
134 independent epitopes on the RBD related to SARS-CoV-2 neutralization, from which  
135 13G9e may represent a key antigenic site for the binding of potent neutralizing Abs to  
136 the RBD.

137 To test whether our mAbs could elicit synergistic effect against SARS-CoV-2, we  
138 paired each of the top 3 neutralizing Abs (58G6, 510A5 or 13G9) with one Ab  
139 exhibiting much lower potency from another group shown in Fig 2a. Synergistic  
140 effects were observed for all combinations at higher levels of inhibition against the  
141 authentic virus, confirming the synergistic advantage of neutralizing Ab cocktails (Fig.  
142 2b-d). Of note, adding neutralizing Ab from a different cluster barely reduced the

143 IC<sub>50</sub>s of the top 3 mAbs, indicating that our potent mAbs alone were sufficient in  
144 neutralizing SARS-CoV-2 (Fig. 2b-d).

145

#### 146 **58G6 recognized a linear binding region in the denatured RBD**

147 To determine the precise interactive regions of our potent neutralizing Abs, first, we  
148 assessed the binding ability of the top 20 mAbs to the denatured RBD. In a  
149 preliminary screening, 9 mAbs from our top 20 mAbs to SARS-CoV-2 RBD were  
150 found to be capable of directly binding to the denatured RBD (Extended Data Fig. 8).  
151 Therefore, we designed and synthesized fifteen 20-mer peptides (RBD1 to RBD15),  
152 overlapping with 5 amino acids, to cover the entire sequence of the RBD, as amino  
153 acids 319-541 of SARS-CoV-2 S (S<sup>319-541</sup>) (Extended Data Fig. 9a). Unexpectedly,  
154 instead of a continuous linear region, we found that 5 of these 9 mAbs could  
155 simultaneously recognize 3 independent fragments (RBD2, RBD9 and RBD13), while  
156 58G6 only strongly bound to RBD9 (S<sup>439-459</sup>) (Extended Data Fig. 9b, c). To  
157 determine the essential amino acid residues in the RBD accounted for 58G6 binding,  
158 we re-synthesized two 20-mer peptides overlapping with 15 amino acids (RBD9-1  
159 and RBD9-2), covering the RBD9 specific residues (Extended Data Fig. 9a). The  
160 results of peptide ELISA revealed that 58G6 preferentially interacted with RBD9-1  
161 than RBD9, in a dose-dependent manner, whereas no interaction of 58G6 with  
162 RBD9-2 was observed (Fig. 3a, b). When we individually replaced each amino acid  
163 residue in RBD9-1 (S<sup>444-463</sup>) with alanine (A), we found that the binding of 58G6 to a



164 fragment of 8 amino acids ( $S^{450-457}$ ) was significantly reduced (Fig. 3a). To a lesser  
165 extent,  $S^{445-449}$  and  $S^{458-463}$  also slightly affected the binding of 58G6, and the former  
166 might explain for the abolished interaction of 58G6 with RBD9-2 (Fig. 3a). Moreover,  
167 we found that RBD9-1 bound to ACE2 in a dose-dependent manner, which could be  
168 competitively inhibited by 58G6 (Fig. 3c-e). And the region of  $S^{445-463}$  was identified  
169 to be critical for the RBD9-1-ACE2 interaction (Fig. 3c, d). Hence,  $S^{445-463}$  represents  
170 an important region of SARS-CoV-2 RBD for the recognition of neutralizing Abs  
171 represented by 58G6. It is worth mentioning that the interaction of 510A5 or 13G9  
172 with the denatured RBD was not observed (Extended Data Fig. 8). Taken together, we  
173 evidenced a linear region in the denatured RBD ( $S^{450-457}$ ) that could be recognized by  
174 58G6, which was one of the ultrapotent neutralizing Abs against authentic  
175 SARS-CoV-2 and B.1.351 viruses.

176

177 **58G6 and 13G9 encoded by the *IGHV1-58* and *IGKV3-20* germline genes both**  
178 **recognized the steric region of  $S^{470-495}$  on the RBD**

179 To further investigate the molecular mechanism of our neutralizing Abs against  
180 SARS-CoV-2, we determined the single-particle cryo-electron microscopy (cryo-EM)  
181 structures of the antigen binding fragments (Fabs) of 58G6 or 13G9 in complex with  
182 the modified SARS-CoV-2 S trimer with stabilizing mutations<sup>25</sup> (Extended Data Fig.  
183 10a, b). We refined these two complex structures to the overall resolution of 3.6 Å for  
184 58G6 and 3.9 Å for 13G9, respectively (Fig. 4a, b, Extended Data Fig. 10c-j and

185 Extended Data Table. 1). For either the 58G6 or the 13G9 complex, the  
186 three-dimensional classification of the cryo-EM data showed the presence of a  
187 dominant conformational state of S trimers in complex with the Fabs, with the  
188 majority of selected particle images representing a 3-Fab-per-trimer complex (Fig. 4a,  
189 b). As shown in Fig. 4a, in individual complex, each 58G6 Fab interacted with one  
190 RBD in the “up” state. Similar to the structure of the 58G6 Fab-S complex, only one  
191 dominant particle class was observed for the 13G9 Fab-S complex, corresponding to a  
192 3-Fab-bound complex with all 3 RBDs in the “up” conformation (Fig. 4b).

193 Further refinement of the variable domains of 58G6 or 13G9 and the RBD to 3.5 Å  
194 or 3.8 Å, respectively, revealed detailed molecular interactions within their binding  
195 interface (Extended Data Fig. 10c-f, g-j). These two refined density maps along with  
196 the predicted structures of the 58G6 and 13G9 Fabs were used to build the models to  
197 illustrate detailed amino acid structures in three dimensions (Extended Data Fig. 11)<sup>26</sup>.  
198 Superimposition of the RBDs in the structures of 58G6 Fab-RBD and ACE2-RBD  
199 complexes indicates a steric clash between ACE2 and the variable domains on the  
200 heavy chain (HC) and the light chain (LC) of 58G6 Fab (Fig. 4c). Such observations  
201 indicate that 58G6 can competitively inhibit the interaction between the SARS-CoV-2  
202 RBD and ACE2. Likewise, an almost identical steric clash between 13G9 Fab and  
203 ACE2 was observed, indicating that the SARS-CoV-2 RBD-ACE2 interaction can be  
204 prohibited by 13G9 (Fig. 4c). When we compared the details of binding interface of  
205 these 2 mAbs and RBD, they showed high level of structural similarity (Fig. 4d).

206 Specifically, majority of the complementarity determining regions (CDRs; CDRH2,

207 CDRH3, CDRL1 and CDRL3) of 58G6 Fab directly participate in the interaction with  
208 the steric region of S<sup>470-495</sup> (Fig. 5a). Meanwhile, 13G9 Fab was shown to recognize  
209 the same steric region using its CDRs: CDRH2, CDRH3, CDRL1 and CDRL3 (Fig.  
210 5b). In parallel, an additional site of residues 450-458 on SARS-CoV-2 S (S<sup>450-458</sup>)  
211 was observed for 58G6 recognition (Fig. 5b), which contained the linear region of  
212 S<sup>450-457</sup> we had identified with the denatured RBD, as shown above (Fig. 3a, b).

213 We found that both 58G6 and 13G9 were derived from *IGHV1-58* for the heavy  
214 chain and *IGKV3-20* for the light chain, with a few differences in amino acid  
215 constitution of their CDRH1, CDRH3 and CDRL3 (Extended Data Table. 2). These  
216 identical germline gene origins correlated with the structural similarity between 58G6  
217 and 13G9 (Fig. 4d). Several potential hydrogen bonds were identified on the contact  
218 surface of each mAb and RBD, representing the unique network associated with  
219 individual CDRs and amino acid residues within the epitope corresponding to each  
220 mAb (Fig. 5c, d). In summary, these Fab-S complex structures suggest that 58G6 and  
221 13G9 adopt the same potential neutralizing mechanism, wherein they are capable to  
222 simultaneously bind to 3 RBDs, occluding the access of SARS-CoV-2 S to ACE2.  
223 Notably, N94 in the CDRL3 of 58G6 or R94 in 13G9 forms a hydrogen bond with the  
224 carbonyl group on the main chain, rather than the side chain, of S<sup>E484</sup> (Fig. 5c, d).  
225 Moreover, direct contact with a hydrogen bond was found between T105 in the  
226 CDRH3 of 58G6 and K458 in the RBD, but not for S105 in 13G9 (Fig. 5c, d).

227

228 **58G6 and 510A5 showed protective efficacy against SARS-CoV-2 and B.1.351 *in***

229 ***vivo***

230 Given the IC<sub>50</sub>s of our mAbs 58G6 and 510A5 against authentic B.1.351 were as low  
231 as approximately 2 ng/mL *in vitro*, we tested their prophylactic efficacy in the  
232 transgenic animal model. Different groups of hACE2 mice received intraperitoneal  
233 administration of these 2 mAbs or PBS 24 hours before an intranasal challenge with  
234 authentic SARS-CoV-2 (WIV04) or B.1.351. For the hACE2 mice challenged with  
235 SARS-CoV-2 (WIV04), the PBS group showed significant loss of body weight, while  
236 those animals from either mAb-treated group retained their body weight for 3 days  
237 post-infection (Fig. 6a). When challenged with B.1.351, the hACE2 mice receiving  
238 PBS showed gradual weight loss and reached an approximately 30% drop at day 3,  
239 whereas the treatment of 58G6 or 510A5 effectively stopped the B.1.351-induced  
240 weight reduction (Fig. 6a). Importantly, we found that the viral load of either  
241 SARS-CoV-2 or B.1.351 in the lung tissues was significantly decreased with a single  
242 dose of either mAb (Fig. 6b). These results indicate that 58G6 and 510A5 can  
243 effectively protected hACE2 transgenic mice from infectious SARS-CoV-2 and  
244 B.1.351, highlighting their prophylactic potential in the present COVID-19 epidemic.

245

## 246 **Discussion**

247 The persistence of COVID-19 has led to generation of mutational variants and  
248 immunological adaptation of SARS-CoV-2<sup>1-11</sup>. Newly emerged B.1.351 in South

249 Africa has been reported to confer resistance to neutralization from multiple available  
250 mAbs, convalescent plasma and vaccinee sera, posing a high re-infection risk<sup>2-9</sup>. In  
251 the present study, we identified 20 neutralizing Abs with high potency against  
252 authentic SARS-CoV-2 virus, from a RBD specific mAb reservoir. Among them,  
253 58G6 and 510A5 exhibit high neutralizing capabilities against the authentic virus.  
254 Remarkably, these 2 mAbs can efficiently neutralize authentic B.1.351 virus,  
255 comparable to most effective neutralizing Abs reported up to date<sup>2,5,6,9</sup>. Their IC<sub>50s</sub>  
256 against this variant were as low as approximately 2 ng/mL, hence we termed these 2  
257 mAbs as ultrapotent neutralizing Abs. Such profound neutralizing potencies were  
258 confirmed in vivo where the prophylactic treatment of these 2 mAbs could efficiently  
259 protect the transgenic mice carrying hACE2 against the airway exposure of authentic  
260 SARS-CoV-2 and B.1.351 viruses. These results put 58G6 and 510A5 at the center  
261 stage for the development of clinically effective therapeutic regimens against the  
262 current COVID-19 pandemic.

263 In order to understand the high neutralizing potency of our mAbs against  
264 SARS-CoV-2, we assessed the antigenic landscape of SARS-CoV-2 RBD. We found  
265 that all our RBD targeting mAbs could be categorized into 5 groups according to their  
266 recognition on the RBD. Interestingly, the epitopes recognized by the majority of our  
267 potent neutralizing Abs overlapped with 13G9e, suggesting that it represented one of  
268 the vulnerable sites on SARS-CoV-2 RBD. The other 4 of the top 20 mAbs competed  
269 with 510A5 for the binding of RBD at 510A5e. It is worth mentioning that these 2  
270 regions may correspond to 2 separate classes of epitopes recognized by the largest

271 numbers of RBD specific neutralizing Abs, as described in recent studies (Extended  
272 Data Fig. 7 and 12)<sup>18,27</sup>.

273 In detail, we identified that 58G6 recognized a region consisted of amino acids  
274 450-458 in the RBD. Of note, recent cryo-EM structure analysis has revealed 3 key  
275 ACE2-interacting residues (S<sup>Y453</sup>, S<sup>L455</sup>, and S<sup>F456</sup>)<sup>13,14</sup>, indicating that S<sup>450-458</sup> may be  
276 the critical site taken into consideration for SARS-CoV-2 prophylaxis. we found at  
277 least one specific hydrogen bond within this region, between 58G6 and RBD, that  
278 may contribute to recognition of the unique linear region by 58G6, rather than 13G9.  
279 Although certain steric proximity of 13G9 to S<sup>450-458</sup> has been observed, it needs to be  
280 pointed out that no specific linear binding sites have been identified for this mAb.

281 Moreover, 13G9 and 58G6 both recognized the steric epitope of S<sup>470-495</sup> on the  
282 RBD, which was the key region shared by ACE2 and several reported potent  
283 neutralizing Abs against SARS-CoV-2<sup>13,14,22,27</sup>. The cryo-EM analysis revealed a  
284 hydrogen bond between N94 in 58G6 and the carbonyl group on the main chain,  
285 rather than the side chain, of S<sup>E484</sup>. Common mutation within this region found in  
286 current variants, such as S<sup>E484K</sup> in B.1.351 or P.1 emerged in Brazil<sup>9,11</sup>, may not have  
287 significant impact on the affinity of 58G6 to the RBDs of these variants. Indeed, the  
288 sustained affinity of 58G6 to B.1.351 S1 has been confirmed by the SPR, which may  
289 explain for the potentially broad neutralizing spectrum of 58G6. However, for 13G9,  
290 the S<sup>E484K</sup> mutation in B.1.351 or P.1 may introduce an additional positive charge  
291 around R94 within its CDRL3, which may lead to strong electrostatic repulsions  
292 between the two residues. This may explain the decreased affinity of 13G9 to B.1.351,

293 hence the slight decrease of neutralizing potency against this variant. As far as we  
294 know, we are the first to report that an ultrapotent neutralizing Ab to SARS-CoV-2  
295 with direct contact to S<sup>E484K</sup> still exhibits exceptional potency against authentic  
296 B.1.351 virus.

297 For the potent 13G9 or 58G6, we noted that the RBDs interacting with the 3 Fabs  
298 of Abs are universally in the ‘up’ state. As previously described, such full occupancy  
299 in each complex could render RBD completely inaccessible for ACE2<sup>15,18,20,22</sup>.  
300 However, the significance of this observed phenomena with 3-“up” conformation in  
301 all particles of the Fab-S complex, in another word, its correlation to the  
302 neutralization advantages, remains unknown.

303 Interestingly, we noted that 13G9 and 58G6, though originally isolated from the  
304 samples of different COVID-19 convalescent donors, were both transcribed from  
305 *IGHV1-58* and *IGKV3-20*. These 2 variant regions were also genetically responsible  
306 for a panel of reported neutralizing Abs with high potency against SARS-CoV-2 as  
307 well as B.1.351<sup>5,6,21,22,27</sup>. These findings highlighted the otherwise overlooked  
308 importance for the pairing of the *IGHV1-58* and the *IGKV3-20* germline genes in  
309 neutralizing SARS-CoV-2 and its variant.

310 In conclusion, we present 2 ultrapotent SARS-CoV-2 RBD specific mAbs with  
311 exceptional efficacy against B.1.351, for which a significant proportion of reported  
312 neutralizing Abs are impaired. Structural analysis of epitopes revealed the potential  
313 neutralizing mechanism of neutralizing Abs against B.1.351 carrying the E484K  
314 mutation. These broad-spectrum neutralizing Abs could be promising candidates for

315 the prophylaxis and therapeutic interventions of the pandemic of SARS-CoV-2

316 variants carrying escape mutations.

317



318 **References**

- 319 1. Korber, B., *et al.* Tracking Changes in SARS-CoV-2 Spike: Evidence that  
320 D614G Increases Infectivity of the COVID-19 Virus. *Cell* **182**, 812-827.e819  
321 (2020).
- 322 2. Wang, P., *et al.* Antibody Resistance of SARS-CoV-2 Variants B.1.351 and  
323 B.1.1.7. *Nature* (2021).
- 324 3. Wibmer, C.K., *et al.* SARS-CoV-2 501Y.V2 escapes neutralization by South  
325 African COVID-19 donor plasma. *Nature Medicine* (2021).
- 326 4. Hu, J., *et al.* Emerging SARS-CoV-2 variants reduce neutralization sensitivity  
327 to convalescent sera and monoclonal antibodies. *Cellular & Molecular*  
328 *Immunology* (2021).
- 329 5. Chen, R.E., *et al.* Resistance of SARS-CoV-2 variants to neutralization by  
330 monoclonal and serum-derived polyclonal antibodies. *Nature Medicine*  
331 (2021).
- 332 6. Zhou, D., *et al.* Evidence of escape of SARS-CoV-2 variant B.1.351 from  
333 natural and vaccine induced sera. *Cell* (2021).
- 334 7. Planas, D., *et al.* Sensitivity of infectious SARS-CoV-2 B.1.1.7 and B.1.351  
335 variants to neutralizing antibodies. *Nature Medicine* (2021).
- 336 8. Garcia-Beltran, W.F., *et al.* Multiple SARS-CoV-2 variants escape  
337 neutralization by vaccine-induced humoral immunity. *Cell*,  
338 S0092-8674(0021)00298-00291 (2021).
- 339 9. Hoffmann, M., *et al.* SARS-CoV-2 variants B.1.351 and P.1 escape from  
340 neutralizing antibodies. *Cell* (2021).
- 341 10. Tegally, H., *et al.* Sixteen novel lineages of SARS-CoV-2 in South Africa.  
342 *Nature Medicine* (2021).
- 343 11. Wang, P., *et al.* Increased Resistance of SARS-CoV-2 Variant P.1 to Antibody  
344 Neutralization. *bioRxiv*, 2021.2003.2001.433466 (2021).
- 345 12. Li, S., *et al.* Immune characteristics analysis reveals two key inflammatory  
346 factors correlated to the expressions of SARS-CoV-2 S1-specific antibodies.

- 347            *Genes & Diseases* (2020).
- 348    13.    Lan, J., *et al.* Structure of the SARS-CoV-2 spike receptor-binding domain  
349            bound to the ACE2 receptor. *Nature* **581**, 215-220 (2020).
- 350    14.    Walls, A.C., *et al.* Structure, Function, and Antigenicity of the SARS-CoV-2  
351            Spike Glycoprotein. *Cell* **181**, 281-292.e286 (2020).
- 352    15.    Barnes, C.O., *et al.* Structures of Human Antibodies Bound to SARS-CoV-2  
353            Spike Reveal Common Epitopes and Recurrent Features of Antibodies. *Cell*  
354            **182**, 828-842.e816 (2020).
- 355    16.    Robbiani, D.F., *et al.* Convergent antibody responses to SARS-CoV-2 in  
356            convalescent individuals. *Nature* **584**, 437-442 (2020).
- 357    17.    Shi, R., *et al.* A human neutralizing antibody targets the receptor-binding site  
358            of SARS-CoV-2. *Nature* **584**, 120-124 (2020).
- 359    18.    Liu, L., *et al.* Potent neutralizing antibodies against multiple epitopes on  
360            SARS-CoV-2 spike. *Nature* **584**, 450-456 (2020).
- 361    19.    Cao, Y., *et al.* Potent Neutralizing Antibodies against SARS-CoV-2 Identified  
362            by High-Throughput Single-Cell Sequencing of Convalescent Patients' B Cells.  
363            *Cell* **182**, 73-84.e16 (2020).
- 364    20.    Brouwer, P.J.M., *et al.* Potent neutralizing antibodies from COVID-19 patients  
365            define multiple targets of vulnerability. *Science (New York, N.Y.)* **369**, 643-650  
366            (2020).
- 367    21.    Zost, S.J., *et al.* Potently neutralizing and protective human antibodies against  
368            SARS-CoV-2. *Nature* **584**, 443-449 (2020).
- 369    22.    Tortorici, M.A., *et al.* Ultrapotent human antibodies protect against  
370            SARS-CoV-2 challenge via multiple mechanisms. *Science (New York, N.Y.)*  
371            **370**, 950-957 (2020).
- 372    23.    Wu, Y., *et al.* A noncompeting pair of human neutralizing antibodies block  
373            COVID-19 virus binding to its receptor ACE2. *Science (New York, N.Y.)* **368**,  
374            1274-1278 (2020).
- 375    24.    Han, X., *et al.* A Rapid and Efficient Screening System for Neutralizing

- 376           Antibodies and Its Application for SARS-CoV-2. *Frontiers in Immunology*  
377           **12**(2021).
- 378   25.   Wrapp, D., *et al.* Cryo-EM structure of the 2019-nCoV spike in the prefusion  
379           conformation. *Science (New York, N.Y.)* **367**, 1260-1263 (2020).
- 380   26.   Kelley, L.A., Mezulis, S., Yates, C.M., Wass, M.N. & Sternberg, M.J.E. The  
381           Phyre2 web portal for protein modeling, prediction and analysis. *Nature*  
382           *Protocols* **10**, 845-858 (2015).
- 383   27.   Dejnirattisai, W., *et al.* The antigenic anatomy of SARS-CoV-2 receptor  
384           binding domain. *Cell* (2021).
- 385

## 386   **Materials and Methods**

### 387   **Patient information and Isolation of antibodies to SARS-CoV-2**

388   The 74 mAbs analyzed in our manuscript were derived from a total of 39 COVID-19  
389   convalescent blood samples collected within a 2-month window post discharge. These  
390   39 convalescent patients have an average age of 45 years old, and majority of them  
391   exhibited mild symptoms, as described in the previous study<sup>24</sup>. The original studies to  
392   obtain blood samples after written informed consent were previously described and  
393   had been approved by the Ethics Board of ChongQing Medical University<sup>24</sup>. Briefly,  
394   we utilized SARS-CoV-2 RBD as bait to sort the antigen-specific memory B cells  
395   from the COVID-19 convalescent patients. The IgG heavy and light chains of mAbs  
396   genes in these memory B cells were obtained by single cell PCR and transiently  
397   transfected into HEK293T cells for the identification of mAbs with capabilities of the  
398   neutralization against SARS-CoV-2 pseudovirus. With such rapid screening system,

399 we were capable to obtain the defined neutralizing Abs within 6 days.

#### 400 **Recombinant antibody production and purification**

401 A pair of plasmids separately expressing the heavy- and the light- chain of antibodies  
402 were transiently co-transfected into Expi293™ cells (Catalog No. A14528,  
403 ThermoFisher) with ExpiFectamine™ 293 Reagent. Then the cells were cultured in  
404 shaker incubator at 120 rpm and 8% CO<sub>2</sub> at 37°C. After 7 days, the supernatants with  
405 the secretion of antibodies were collected and captured by protein G Sepharose (GE  
406 Healthcare). The bound antibodies on the Sepharose were eluted and dialyzed into  
407 phosphate-buffered saline (PBS). The purified antibodies were used in following  
408 binding and neutralization analyses.

#### 409 **Authentic SARS-CoV-2 neutralization assay**

410 The neutralizing potency of mAbs against authentic SARS-CoV-2 virus quantified via  
411 qRT-PCR was performed in a biosafety level 3 laboratory of Fudan University.  
412 Serially diluted mAbs or mAbs mixture (1:1 with same quality) were incubated with  
413 authentic SARS-CoV-2 virus (nCoV-SH01, GenBank: MT121215.1, 100 TCID<sub>50</sub>) for  
414 1 h at 37 °C. After the incubation, the mixtures were then transferred into 96-well  
415 plates, which were seeded with Vero E6 cells. The plates were kept at 37 °C for 48 hrs.  
416 And the supernatant viral RNA load of each well was quantified by qRT-PCR. For  
417 qRT-PCR, the viral RNA was extracted from the collected supernatant using Trizol LS  
418 (Invitrogen) and used as templates for the qRT-PCR analysis by Verso 1-Step  
419 qRT-PCR Kit (Thermo Scientific) following the manufacturer's instructions. PCR  
420 primers targeting SARS-CoV-2 N gene (nt 608-706) were as followed, forward:

421 5'-GGGGAAGTTCTCCTGCTAGAAT-3', and reverse:  
422 5'-CAGACATTTTGCTCTCAAGCTG-3'. qRT-PCR was performed using the  
423 LightCycler 480 II PCR System (Roche) with the following program: 50 °C 15 mins;  
424 95 °C 15 mins; 40 cycles of 95 °C 15 seconds, 50 °C 30 seconds, 72 °C 30 seconds.  
425 The IC<sub>50</sub> and IC<sub>80</sub> of the evaluated mAbs was and calculated by a four-parameter  
426 logistic regression using GraphPad Prism 8.0.

427 The neutralizing potency of mAbs against authentic SARS-CoV-2 and B.1.351  
428 viruses was performed quantified via PRNT in a biosafety level 3 laboratory of  
429 Wuhan Institute of Virology. Each mAb sample was serially diluted with DMEM as  
430 two folds and the sample quality, mixed with equal volume of authentic SARS-CoV-2  
431 virus (WIV04, GenBank: MN996528.1) or SARS-CoV-2 South Africa strain B.1.351  
432 (NPRC 2.062100001, GenBank: MW789246.1) and incubated at 37 °C for 1 h. Vero  
433 E6 cells in 24-well plates were inoculated with the sera-virus mixture at 37 °C; 1 h.  
434 Later, the mixture was replaced with DMEM containing 2.5% FBS and 0.8%  
435 carboxymethylcellulose. The plates were fixed with 8% paraformaldehyde and stained  
436 with 0.5% crystal violet 4 days later. All samples were tested in duplicate and  
437 neutralization titers were defined as the serum dilution resulting in a plaque reduction  
438 of at least 50%<sup>30</sup>.

#### 439 **Sequence analysis of antigen-specific mAbs**

440 IMGT/V-QUEST (<http://www.imgt.org/> IMGT\_vquest /vquest) and IgBLAST  
441 (<https://www.ncbi.nlm.nih.gov/igblast/>), MIXCR (<https://mixcr.r>  
442 [eadthedocs.io/en/master/](http://eadthedocs.io/en/master/)) and VDJtools

443 (<https://vbjtools-doc.readthedocs.io/en/master/overlap.html>) tools were used to do the  
444 variable region analysis and annotation for each antibody clone.

#### 445 **Production of pseudovirus bearing S protein**

446 pVSVG expressing SARS-CoV-2 S protein was constructed as previously described<sup>29</sup>.  
447 The packaging plasmid (VSV-G pseudotyped  $\Delta$ G-luciferase) encoding either the S  
448 protein of SARS-CoV-2, B.1.1.7 or chimeric construct including B.1.351 RBD and  
449 S<sup>D614G</sup> was generated. HEK293T cells were grown to 80% confluency before  
450 transfection with VSV-G pseudotyped  $\Delta$ G-luciferase, pWPXL and pSPAX2. These  
451 cells were cultured overnight at 37 °C with 5% CO<sub>2</sub>. DMEM supplemented with 5%  
452 fetal bovine serum and 100 IU/mL of penicillin and 100 µg/mL of streptomycin was  
453 added to the inoculated cells, which were cultured overnight for 72 hrs. The  
454 supernatant was harvested, filtered by 0.45 µm filter and centrifugated at 300 g for 10  
455 mins to collect the supernatant, then aliquoted and storied at -80 °C.

#### 456 **Pseudovirus neutralization assay**

457 Serially diluted mAbs with volume of 50 µL were incubated with the same volume of  
458 the HEK293T cell supernatants containing the pseudovirus for 1 h at 37 °C. These  
459 pseudovirus-antibody mixtures were added to ACE2 expressing HEK293T cells  
460 (HEK293T/ACE2). After 72 hrs, the luciferase activities of infected HEK293T/ACE2  
461 cells were detected by the Bright-Luciferase Reporter Assay System (Promega,  
462 E2650). The IC<sub>50</sub> of the evaluated mAbs was tested by the Varioskan LUX Microplate  
463 Spectrophotometer (Thermo Fisher), and calculated by a four-parameter logistic  
464 regression using GraphPad Prism 8.0.

465 **Protein expression and purification**

466 To express the prefusion S ectodomain, the gene encoding residues 1-1208 of  
467 SARS-CoV-2 S (GenBank: MN908947.3) with a C-terminal T4 fibrin trimerization  
468 motif, an HRV-3C protease cleavage site, a Twin-Strep-tag and an 8 × His-tag was  
469 synthesized, and cloned into the mammalian expression vector pcDNA3.1, which was  
470 a kind gift from L. Sun at Fudan University, China. The gene of the S protein was  
471 constructed with proline substitutions at residues 986 and 987, a “GSAS” instead of  
472 “RRAR” at the furin cleavage site (residues 682-685) according to Jason S.  
473 McLellan’s research<sup>25</sup>.

474 Expi293 cells (Thermo Fisher Scientific, USA) cultured in Freestyle 293  
475 Expression Medium (Thermo Fisher Scientific, USA) were maintained at 37 °C. Cells  
476 were diluted to a density of  $2.5 \times 10^6$  to  $3 \times 10^6$  cells per mL before transfection. For  
477 protein production, 1.2 mg DNA was mixed with 3 mg polyethyleneimine in 30 mL  
478 Freestyle 293 Expression Medium, incubated for 20 mins, then added to 1000 mL of  
479 cells<sup>31</sup>. Transfected cells were cultured at 35 °C, and the cell culture supernatant was  
480 collected at day 4 to day 5.

481 The protein was purified from filtered cell supernatants using Strep-Tactin resin (IBA)  
482 before being subjected to additional purification by gel filtration chromatography  
483 using a Superose 6 10/300 column (GE Healthcare, USA) in 1 × PBS, pH 7.4  
484 (Extended Data Fig. 10a, b).

485 **Cryo-EM sample preparation and data collection**

486 Purified SARS-CoV-2 S was diluted to a concentration of 1.5 mg/mL in PBS, pH 7.4.

487 5  $\mu$ L of purified SARS-CoV-2 S was mixed with 1  $\mu$ L of 58G6 Fab fragments at 2  
488 mg/mL in PBS and incubated for 30 mins on ice. A 3  $\mu$ L aliquot of the mixture (added  
489 with 0.01% DDM) was applied onto an H<sub>2</sub>/O<sub>2</sub> glow-discharged, 300-mesh Quantifoil  
490 R1.2/1.3 grid (Quantifoil, Micro Tools GmbH, Germany). The grid was then blotted  
491 for 3.0 s with a blot force of -1 at 8 °C and 100% humidity and plunge-frozen in  
492 liquid ethane using a Vitrobot (Thermo Fisher Scientific, USA). Cryo-EM data sets  
493 were collected at a 300 kV Titan Krios microscope (Thermo Fisher Scientific, USA)  
494 equipped with a K3 detector (Gatan, USA). The exposure time was set to 2.4 s with a  
495 total accumulated dose of 60 electrons per  $\text{\AA}^2$ , which yields a final pixel size of 0.82  
496  $\text{\AA}$ . 2605 micrographs were collected in a single session with a defocus range  
497 comprised between 1.0 and 2.8  $\mu$ m using SerialEM. The sample preparation and data  
498 collection for the SARS-CoV-2 S-13G9 Fab complex were in accordance with the  
499 SARS-CoV-2 S-58G6 Fab complex. The statistics of cryo-EM data collection can be  
500 found in Extended Data Table 1.

#### 501 **Cryo-EM data processing**

502 All dose-fractioned images were motion-corrected and dose-weighted by  
503 MotionCorr2 software<sup>32</sup> and their contrast transfer functions were estimated by  
504 cryoSPARC patch CTF estimation<sup>33</sup>. For the dataset of SARS-CoV-2 S-58G6 Fab  
505 complex, a total of 1,255,599 particles were auto-picked using the template picker and  
506 820,872 raw particles were extracted with a box size of 512 pixels in cryoSPARC<sup>33</sup>.  
507 The following 2D, 3D classifications, and refinements were all performed in  
508 cryoSPARC. 237,062 particles were selected after two rounds of 2D classification,



509 and these particles were used to do Ab-Initio reconstruction in six classes. Then these  
510 six classes were used as 3D volume templates for heterogeneous refinement with all  
511 selected particles, with 108,020 particles converged into the SARS-CoV-2 S-58G6  
512 Fab class. Next, this particle set was used to perform non-uniform refinement,  
513 yielding a resolution of 3.56 Å.

514 For the dataset of SARS-CoV-2 S-13G9 Fab complex, a total of 445,137 particles  
515 were auto-picked using the template picker and 266,357 raw particles were extracted  
516 with a box size of 512 pixels in cryoSPARC. The following 2D, 3D classifications,  
517 and refinements were all performed in room temperature (RT). 70,519 particles were  
518 selected after two rounds of 2D classification, and these particles were used to do  
519 Ab-Initio reconstruction in six classes. Then these 6 classes were used as 3D volume  
520 templates for heterogeneous refinement with all selected particles, with 52,880  
521 particles converged into the SARS-CoV-2 S-13G9 Fab class. Next, this particle set  
522 was used to perform non-uniform refinement, yielding a resolution of 3.92 Å.

523 Although the overall resolution for these structures is up to 3.5 Å - 3.6 Å for 58G6  
524 and 3.9 Å - 4.0 Å for 13G9, the maps for the binding interface between RBD and Fabs  
525 are quite weak due to the conformational heterogeneity of the RBD, which is similar  
526 to previous structural investigations<sup>15,18,22,34</sup>. To improve the resolution for the binding  
527 interface, we subsequently added local refinement processing. A local reconstruction  
528 focusing on the RBD-Fabs region was carried out. Furthermore, the density map for  
529 the binding interface could be improved further by local averaging of the RBD-Fab  
530 equivalent copies, finally yielding a 3.5 Å map of the region corresponding to the

531 58G6 variable domains and the RBD (Extended Data Fig. 10c, f). Similarly, we  
532 improve the local resolution between the 13G9 variable domains and the RBD up to  
533 3.8 Å (Extended Data Fig. 10g, j).

534 Local resolution estimation, filtering, and sharpening were also carried out using  
535 cryoSPARC. The full cryo-EM data processing workflow is described in Extended  
536 Data Fig. 10 and the model refinement statistics can be found in Extended Data Table  
537 1.

### 538 **Model Building and Refinement**

539 To build the structures of the SARS-CoV-2 S-58G6 Fab and S-13G9 Fab complexes,  
540 the structure of the SARS-CoV-2 S glycoprotein in complex with the C105  
541 neutralizing antibody Fab fragment<sup>15</sup> (PDB: 6XCN) was placed and rigid-body fitted  
542 into the cryo-EM electron density maps using UCSF Chimera<sup>35</sup>, respectively. Both of  
543 the 58G6 and 13G9 Fab models were first predicted using Phyre2<sup>26</sup> and then manually  
544 built in Coot 0.9<sup>36</sup> with the guidance of the cryo-EM electron density maps, and  
545 overall real-space refinements were performed using Phenix 1.18<sup>37</sup>. The data  
546 validation statistics are shown in Extended Data Table 1.

### 547 **Creation of Figures**

548 Figures of molecular structures were generated using PyMOL<sup>38</sup> and UCSF  
549 ChimeraX<sup>39</sup>.

### 550 **The antibody binding kinetics and the competition with ACE2 measured by SPR**

551 The affinity of the neutralizing Abs binding to the S1 subunit of SARS-CoV-2 or  
552 B.1.351 was measured using the Biacore X100 platform at RT. A CM5 chip (GE

553 Healthcare) was linked with anti-human IgG-Fc antibody to capture about 9000  
554 response units of the neutralizing Abs. The gradient concentrations of SARS-CoV-2  
555 S1 or an artificial chimeric construct carrying 3 mutations on B.1.351 RBD and S<sup>D614G</sup>  
556 (B.1.351 S1) (Sino Biological, Beijing, China) were prepared (2-fold dilutions, from  
557 50 nM to 0.78 nM) with HBS-EP<sup>+</sup> Buffer (0.01 M HEPES, 0.15 M NaCl, 0.003 M  
558 EDTA and 0.05% (v/v) Surfactant P20, pH 7.4), and sequentially injected into the  
559 chip and monitored for the binding kinetics. After the final reading, the sensor surface  
560 of the chip was regenerated with 3 M MgCl<sub>2</sub> (GE) before the measurement of the next  
561 mAb. The affinity was calculated with Biacore X100 Evaluation Software  
562 (Version:2.0.2) using 1:1 binding fit model.

563 To determine competition with the ACE2 peptidase domain, SARS-CoV-2 RBD  
564 was coated on a CM5 sensor chip via amine group for a final RU around 250. The top  
565 20 neutralizing Abs (20 µg/mL) were injected onto the chip until binding steady-state  
566 was reached. ACE2 (20 µg/mL) was then injected for 60 seconds. Blocking efficacy  
567 was determined by comparison of response units with and without prior antibody  
568 incubation.

### 569 **Competitive ELISA**

570 For competitive ELISA used in epitope mapping of mAbs, 2 µg/mL recombinant  
571 RBD-his (Sino Biological, Beijing, China) was added in 384-well plates and  
572 incubated at 4 °C overnight. 50 µg/mL mAbs per well were added. The plates were  
573 incubated at 37 °C for 1 h and then washed. Biotinylation of mAbs (the top 20  
574 neutralizing Abs and 81A11, previously reported SARS-CoV CR3022<sup>28</sup>) was

575 performed using the EZ-link NHS-PEO Solid Phase Biotinylation Kit (Pierce)  
576 according to the manufacturer's protocol and purified using MINI Dialysis Unit  
577 (ThermoFisher, 69576). 500 ng/mL biotinylated mAbs were added to each well, and  
578 the plates were incubated at 37 °C for 1 h. ALP-conjugated streptavidin (Mabtech,  
579 Sweden, 3310-10) was added at 1:1000, followed by an incubation of 30 mins at  
580 37 °C. For the quantification of bound IgG, PNPP (Thermo Fisher) was added at 1  
581 mg/mL and the absorbance at 405 nm was measured by the MultiSkan GO  
582 fluoro-microplate reader (Thermo Fisher).

### 583 **Western blot analysis**

584 The recombinant RBD protein was mixed with 5 × loading buffer (Beyotime,  
585 Shanghai, China) and denatured for 5 mins at 100 °C. The denatured proteins (200 ng)  
586 were subjected to electrophoresis with 10% SDS-polyacrylamide gel and then  
587 transferred to PVDF membranes. After blocking by skim milk (Biofroxx), the  
588 membranes were incubated at 4 °C overnight, with the purified mAbs as primary Abs.  
589 The next days, the membranes were washed with TBST and incubated with  
590 HRP-conjugated Goat-anti-human Fc antibody (Abcam, ab99759, 1:10000) for 1 h at  
591 RT. The membranes were examined on ChemiDoc Imaging System (Bio-rad).

### 592 **Peptide ELISA**

593 Peptide ELISA was performed with synthesized peptides overlapping with 5 amino  
594 acids (Genescripts, Wuhan, China). These peptides were tethered by N-terminal  
595 biotinylated linker peptides (biotin-ahx), except for the first peptide at the N-terminus,  
596 whose biotin was linked to the C terminus instead. The RBD9-1 amino acid residues

597 were selected and mutated to alanine and synthesized by Genescripts (Wuhan, China).  
598 50  $\mu$ L synthesized peptide was added to the streptavidin-coated 384-well plate in  
599 duplets to make a final concentration of 5  $\mu$ g/mL. The plates were incubated for 2 hrs  
600 at RT. After washing, the plates were blocked with Protein-Free Blocking Buffer  
601 (Pierce, USA, 37573) at RT for 1 h and incubated with 10  $\mu$ g/mL testing mAbs at RT  
602 for another 1 h. Reacted mAbs were detected using ALP-conjugated Goat F(ab')<sub>2</sub>  
603 Anti-Human IgG (Fab')<sub>2</sub> secondary antibody conjugated with ALP (Abcam, ab98532,  
604 1:2000) for 30 mins at RT, followed with quantification detection.

605 For the ACE2 competitive peptide ELISA, 5  $\mu$ g/mL synthesized RBD9-1 was  
606 immobilized on the streptavidin-coated 384-well plate at RT for 2 hrs. After washing  
607 with Protein-Free Blocking Buffer, the plates were blocked with this blocking buffer.  
608 Next, serial diluted 58G6 (20-0.625  $\mu$ g/mL) in 50  $\mu$ L of the blocking buffer were  
609 added into plate and the plates were incubated at RT for 1 h. Then, the plate incubated  
610 with 2  $\mu$ g/mL ACE2 at RT for another 1 h. The ELISA plates were washed 4 times by  
611 blocking buffer and 50  $\mu$ L Goat F(ab')<sub>2</sub> Anti-Human IgG (Fab')<sub>2</sub> secondary antibody  
612 conjugated with ALP (Abcam, ab98532, 1:2000) was incubated with the plate at RT  
613 for 30 mins. The plate was washed and followed with quantification detection.

#### 614 **Authentic SARS-CoV-2 and B.1.351 viruses and animal study**

615 Authentic SARS-CoV-2 (WIV04) and B.1.351 (NPRC 2.062100001) viruses were  
616 propagated on the Vero-E6 cells and titrated by single layer plaque assay with  
617 standard procedure. The hACE2 mouse model was used to evaluate the efficacy of  
618 58G6 and 510A5 monoclonal antibodies *in vivo*. Six- to eight-week-old female

619 hACE2 mice were treated with 58G6 or 510A5 monoclonal antibody at a  
620 concentration of 10 mg/kg by intraperitoneal route, respectively. The mice treated  
621 with PBS were used as the negative control. 24 hours later, all mice were intranasally  
622 infected with  $10^5$  PFU authentic SARS-CoV-2 or B.1.351 viruses in a total volume of  
623 50  $\mu$ L. At 3 days post infection of SARS-CoV-2 or B.1.351, the lungs of mice were  
624 collected for viral load determination using plaque assay<sup>40</sup>.

### 625 **Data analysis**

626 Data are shown as mean  $\pm$  SEM. Two-group comparisons were performed by  
627 Student's t-test. The difference was considered significant if  $p < 0.05$ .

### 628 **References**

- 629 28. Meulen, J., *et al.* Human monoclonal antibody combination against SARS  
630 coronavirus: synergy and coverage of escape mutants. *PLoS medicine* **3**, e237  
631 (2006).
- 632 29. Ou, X., *et al.* Characterization of spike glycoprotein of SARS-CoV-2 on virus  
633 entry and its immune cross-reactivity with SARS-CoV. *Nature*  
634 *Communications* **11**, 1620 (2020).
- 635 30. Singh, K., *et al.* The Vaccinia Virus H3 Envelope Protein, a Major Target of  
636 Neutralizing Antibodies, Exhibits a Glycosyltransferase Fold and Binds  
637 UDP-Glucose. *Journal of Virology*, 5020 (2016).
- 638 31. Xiong, X., *et al.* A thermostable, closed SARS-CoV-2 spike protein trimer.  
639 *Nature Structural & Molecular Biology* (2020).
- 640 32. Zheng, S.Q., *et al.* MotionCor2: anisotropic correction of beam-induced  
641 motion for improved cryo-electron microscopy. *Nature Methods* **14**, 331-332  
642 (2017).
- 643 33. Punjani, A., Rubinstein, J.L., Fleet, D.J. & Brubaker, M.A. cryoSPARC:  
644 algorithms for rapid unsupervised cryo-EM structure determination. *Nature*

- 645            *Methods* **14**, 290-296 (2017).
- 646    34.    Barnes, C.O., *et al.* SARS-CoV-2 neutralizing antibody structures inform  
647            therapeutic strategies. *Nature* **588**, 682-687 (2020).
- 648    35.    Pettersen, E.F., *et al.* UCSF Chimera-A visualization system for exploratory  
649            research and analysis. *Journal of Computational Chemistry* **25**, 1605-1612  
650            (2004).
- 651    36.    Emsley, P., Lohkamp, B., Scott, W.G. & Cowtan, K. Features and development  
652            of Coot. *Acta Crystallographica Section D* **66**, 486-501 (2010).
- 653    37.    Liebschner, D., *et al.* Macromolecular structure determination using X-rays,  
654            neutrons and electrons: recent developments in Phenix. *Acta*  
655            *Crystallographica Section D* **75**, 861-877 (2019).
- 656    38.    Schrodinger, LLC. The PyMOL Molecular Graphics System, Version 1.8.  
657            (2015).
- 658    39.    Goddard, T.D., *et al.* UCSF ChimeraX: Meeting modern challenges in  
659            visualization and analysis. *Protein Science* **27**, 14-25 (2018).
- 660    40.    Zhang, Y.N., *et al.* A mouse model for SARS-CoV-2 infection by exogenous  
661            delivery of hACE2 using alphavirus replicon particles. *Cell Res* **30**, 1046-1048  
662            (2020).
- 663

664 **Figures and Tables**

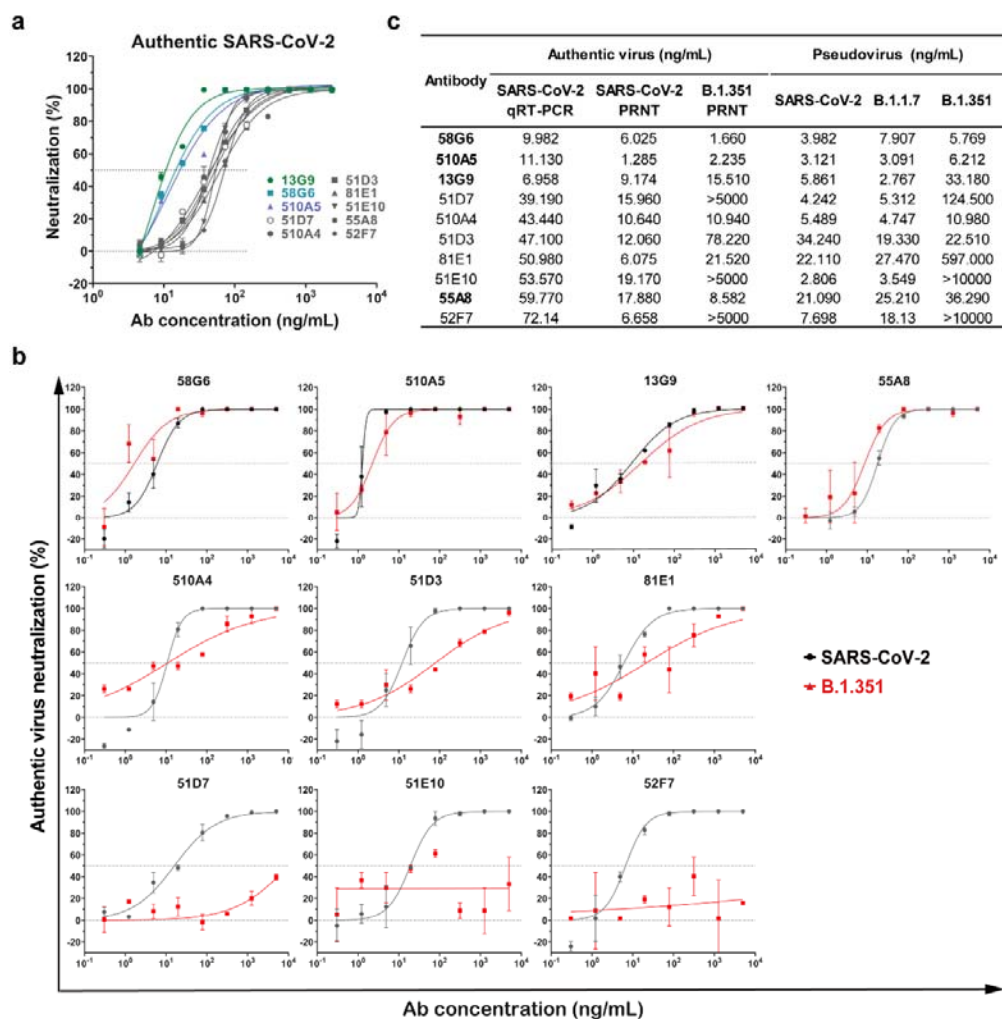

665

666 **Fig. 1 | The neutralizing capabilities of the top 10 mAbs against authentic**

667 **SARS-CoV-2 and B.1.351 viruses.** The neutralizing potency of the top 10 mAbs was

668 measured by authentic SARS-CoV-2 (nCoV-SH01) neutralization assay and

669 quantified by qRT-PCR (a) or authentic SARS-CoV-2 (WIV04) and B.1.351

670 neutralization assays and quantified by PRNT (b). The IC<sub>50</sub>s were summarized in (c).

671 Dashed line indicated 0% or 50% reduction in viral neutralization. Data for each mAb

672 were obtained from a representative neutralization experiment, with at least two



673 replicates, presented as mean  $\pm$  SEM. Effective Abs against authentic B.1.351 were

674 shown in bold.

675

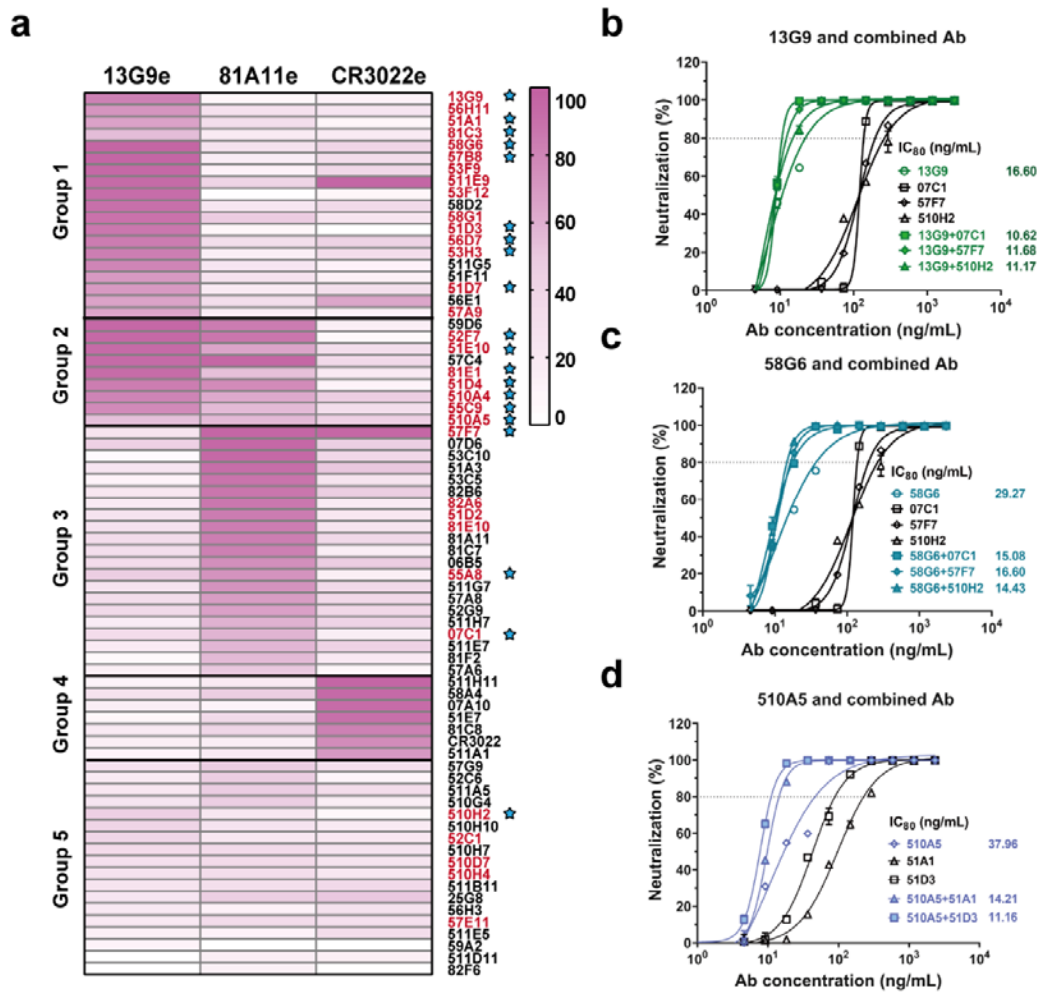

676

677 **Fig. 2 | Epitope mapping of mAbs and the analysis of neutralizing Abs from**

678 **different groups.** (a) Epitope mapping of purified mAbs targeting three independent

679 epitopes (13G9e, 81A11e and CR3022e). All mAbs in Group 1 competed with 13G9;

680 each mAb in Group 3 competed with 81A11; Group 2 consisted of mAbs

681 cross-reacted with 13G9e and 81A11e, the latter to a lesser extent; all mAbs in Group

682 4 targeted the epitopes overlapping with CR3022e, and the mAbs in Group 5

683 recognized none of these 3 epitopes. All neutralizing Abs identified by authentic

684 SARS-CoV-2 CPE assay were labelled in red. The top 20 mAbs identified by

685 qRT-PCR with authentic SARS-CoV-2 virus were indicated by blue stars. The

686 synergistic effects of 13G9 (b) and 58G6 (c) with 07C1 or 57F7 recognizing 81A11e,  
687 or 510H2 with no clearly identified epitope, against authentic SARS-CoV-2 virus  
688 were quantified by qRT-PCR. (d) The synergistic effects of 510A5 with 51A1 or  
689 51D3 recognizing 13G9e, against authentic SARS-CoV-2 virus were quantified by  
690 qRT-PCR. Dashed line indicated 80% inhibition in the viral infectivity. Data for each  
691 mAb were obtained from a representative neutralization experiment of three replicates,  
692 presented as mean  $\pm$  SEM.  
693

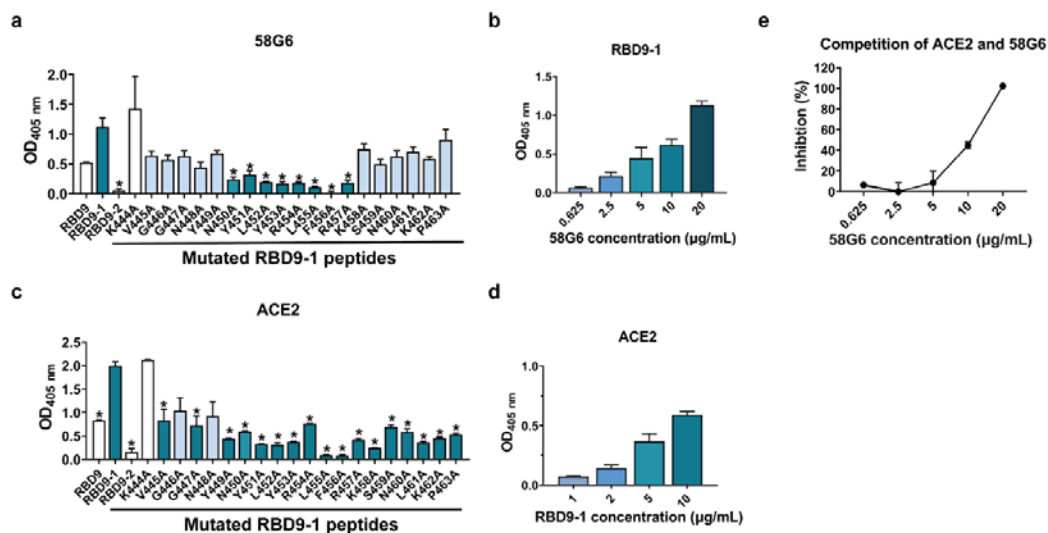

694

695 **Fig 3. | The interaction of 58G6 with a linear region in the denatured RBD.**

696 ELISA results of the binding activities of 58G6 (a) or ACE2 (c) to 3 peptides covering

697 sequences in close proximity, RBD9, RBD9-1 and RBD9-2, and single mutations

698 derived from the full length RBD9-1. The binding activity of 58G6 (b) or ACE2 (d) in

699 various concentrations to the RBD9-1 peptide, tested by ELISA. (e) The ability of

700 58G6 in blocking the interaction between RBD9-1 and ACE2, tested by competitive

701 ELISA. Data are representative of at least 2 independent experiments performed in

702 technical duplicate. The mean  $\pm$  SEM of duplicates are shown. \*,  $p < 0.05$ .

703

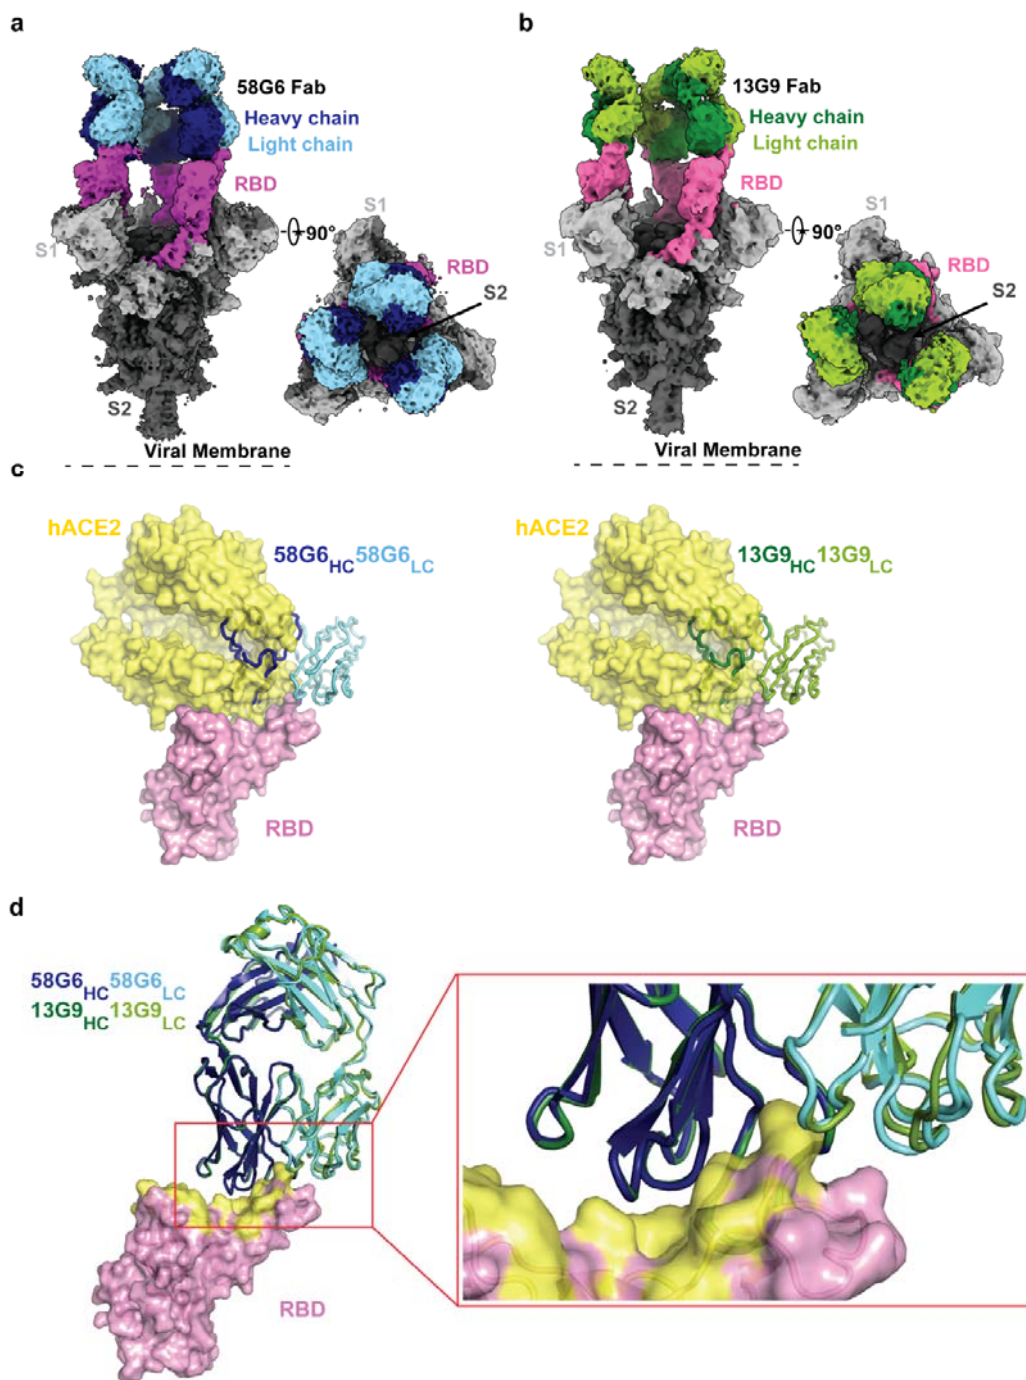

704

705 **Fig. 4 | Cryo-EM structures of 58G6 and 13G9 Fabs binding to open S trimer.** (a,

706 b) Cryo-EM densities for 58G6 Fab-S (a; 3.6 Å) and 13G9 Fab-S (b; 3.9 Å)

707 complexes, revealing binding of 58G6 or 13G9 to RBDs in the all ‘up’ state. (c)

708 Superimposition of RBD-hACE2 [Protein Data Bank (PDB) ID 6LZG] complex

709 structure together with RBD-58G6 Fab (left) or RBD-13G9 Fab (right) variable  
710 domains, respectively. (d) Alignment of 58G6 and 13G9 Fabs on the same RBD. HC,  
711 heavy chain; LC, light chain.

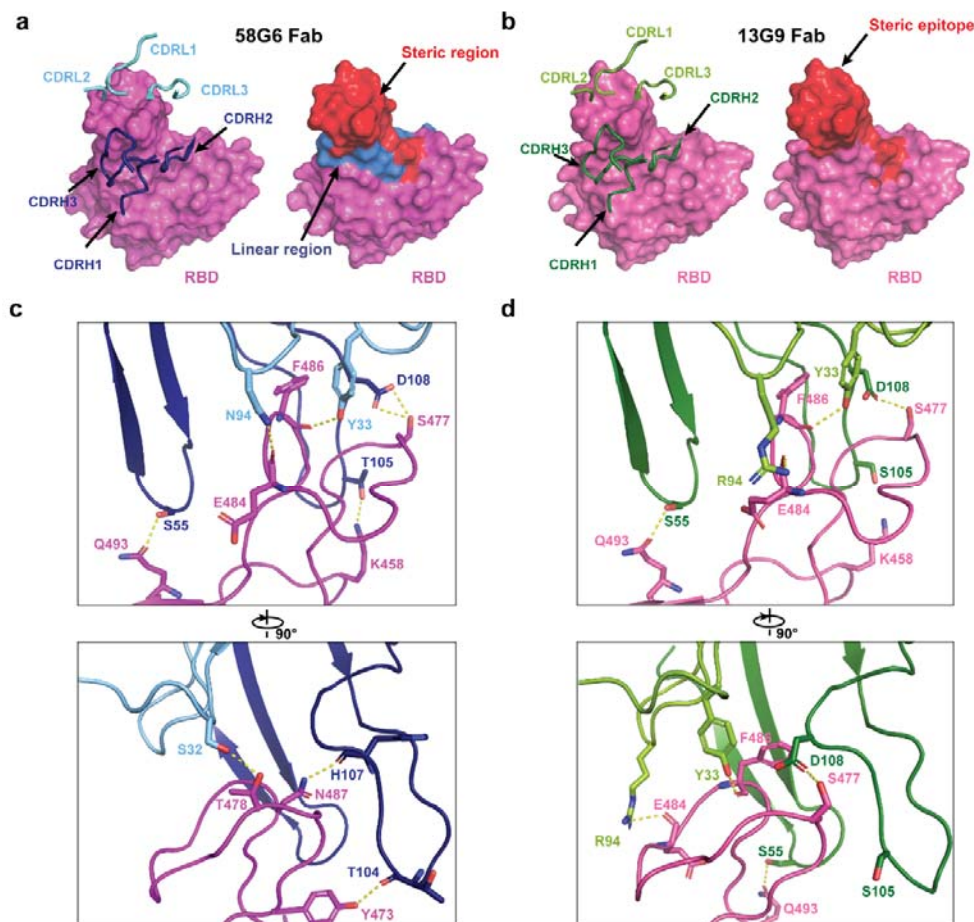

712

713 **Fig. 5 | Details of interactions between SARS-CoV-2 RBD and mAbs.** (a, b) CDR  
714 loops of 58G6 Fab (a, left) and 13G9 Fab (b, left) overlaid on the surface  
715 representation of RBD (shown as pink and magenta, respectively), and surface  
716 representations of 58G6 epitope (a, right, red and blue) and 13G9 epitope (b, right, red)  
717 on the RBD surface. (c, d) The hydrogen bonds at the binding interface between 58G6  
718 (left) or 13G9 (right) and SARS-CoV-2 RBD.

719

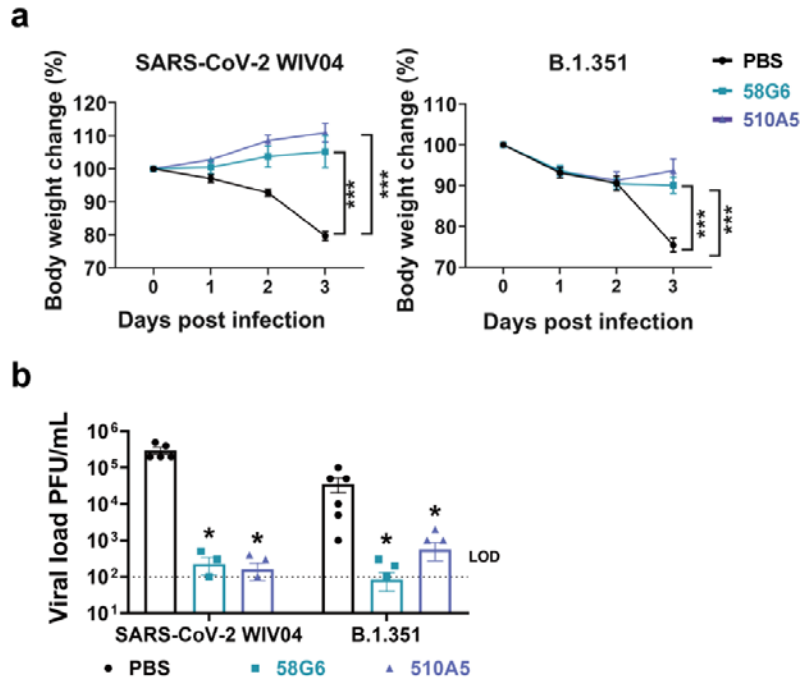

720

721 **Fig. 6 | The prophylactic efficacy of 58G6 or 510A5 in hACE2 transgenic mice**

722 **challenged with authentic viruses.** (a) Body weight changes were recorded for PBS

723 (SARS-CoV-2 (WIV04): n = 5; B.1.351: n = 6), 58G6 (SARS-CoV-2 (WIV04): n = 4;

724 B.1.351: n = 7) and 510A5 (SARS-CoV-2 (WIV04): n = 5; B.1.351: n = 7) treatment

725 groups. All the mice received one dose of antibodies (10 mg/kg body weight) injected

726 (i.p.) 24 hours prior to the intranasal challenge with SARS-CoV-2 (WIV04) (left) or

727 B.1.351 (right). Equal volume of PBS was used as negative control. The weight loss

728 was recorded over 3 days. (b) The virus loads in infected lungs were determined by

729 PRNT at 3 days post infection (dpi). \* $p < 0.1$ , \*\*\* $p < 0.001$ .

730

731



732

733 **Data availability**

734 The coordinates and structure factor files for the 13G9/SARS-CoV-2 RBD complex  
735 and 58G6/SARS-CoV-2 RBD complex have been deposited in the Protein Data Bank  
736 (PDB) under accession number 7E3K and 7E3L respectively.

737 **Acknowledgments**

738 This study was supported by the Emergency Project from Chongqing Medical  
739 University and Chongqing Medical University fund (X4457) with the donation from  
740 Mr. Yuling Feng. We acknowledge the clinical laboratories of Yongchuan Hospital of  
741 Chongqing Medical University and the Third Affiliated Hospital of Chongqing  
742 Medical University for providing blood samples. We are grateful to Xiaoxiao Gao and  
743 Cheng Peng for their technical help, and to Wuhan National Biosafety Laboratory  
744 running team, including engineer, biosafety, biosecurity, and administrative staff. The  
745 SARS-CoV-2 South Africa strain (NPRC 2.062100001) was provided by Guangdong  
746 Provincial Center for Disease Control and Prevention. We also thank all healthy  
747 individuals participated in this study.

748 **Author contributions**

749 A.J. and A.H. conceived and designed the study. F.L. and H.J. were responsible for  
750 antibody production and purification. J.W., K.W., J.H., S.L., N.T., G.Z. and Q.G.  
751 conducted the pseudovirus neutralization assays and Y.X., C.G., Y.W., W.X., X.C.,  
752 D.Q. and Z.Y. performed authentic SARS-CoV-2 neutralization assays. S.L. and Y.H.  
753 played an import role in data analysis of neutralizing Abs sequences. T.L., Y.W., Y.L.,

754 S.S., Q.C., F.G. and M.S. performed ELISA, competitive ELISA and peptide ELISA.  
755 X.H., C.H., R.W. and S.M. were responsible for SPR assay for the affinity of these  
756 neutralizing Abs and competition of these neutralizing Abs with ACE2. H.G., F.L.,  
757 Y.G., W.W., X.J. and H.Y. carried out the cryo-EM studies. H.Z, Y.Z, Z.Z, H.Z, N.L  
758 and B.Z were responsible for the prophylactic test of neutralizing Abs for hACE2  
759 mice challenged with SARS-CoV-2 and B.1.351. L.L. and C.H. generated figures and  
760 tables, and take responsibility for the integrity and accuracy of the data presentation.  
761 A.J., T.L., W.W. and H.G wrote the manuscript.

762 **Declaration of Interests**

763 Patent has been filed for some of the antibodies presented here.

764 **Ethics statement**

765 The project “The application of antibody tests patients infected with SARS-CoV-2”  
766 was approved by the ethics committee of Chongqing Medical University. Informed  
767 consents were obtained from all participants.

768 All the mice were cared in accordance with the recommendations of National  
769 Institutes of Health Guidelines for the Care and Use of Experimental Animals. Viral  
770 infections were conducted in an animal biosafety level 3 (ABSL-3) facility at Wuhan  
771 Institute of Virology under a protocol approved by the Laboratory Animal Ethics  
772 Committee of Wuhan Institute of Virology, Chinese Academy of Sciences (Permit  
773 number: WIVA26201701).
